# Supplementary material for: Adolescents show collective intelligence which can be driven by a geometric mean rule of thumb
Source: PLoS One. 2018 Sep 24;13(9):e0204462. doi: 10.1371/journal.pone.0204462 (PMC6152954; doi:10.1371/journal.pone.0204462)
Supplement: S2 Dataset — (CSV) [file pone.0204462.s019.csv]

Group number	Participant in group	Participant number	Gender	Age	Task order	Number of black sweets	Number of total sweets	Initial estimate	Group estimate
12	1	1	Female	13	1st	94	190	110	105
12	1	1	Female	13	2nd	48	200	40	40
12	2	2	Male	12	1st	94	190	100	105
12	2	2	Male	12	2nd	48	200	50	40
12	3	3	Male	13	1st	94	190	110	105
12	3	3	Male	13	2nd	48	200	30	40
2	1	4	Male	13	1st	121	160	126	127
2	1	4	Male	13	2nd	94	190	92	90
2	1	4	Male	13	3rd	48	200	59	52
2	2	5	Male	12	1st	121	160	125	127
2	2	5	Male	12	2nd	94	190	89	90
2	2	5	Male	12	3rd	48	200	40	52
2	3	6	Male	13	1st	121	160	130	127
2	3	6	Male	13	2nd	94	190	87	90
2	3	6	Male	13	3rd	48	200	62	52
3	1	7	Male	13	1st	48	200	40	60
3	1	7	Male	13	2nd	121	160	126	122
3	1	7	Male	13	3rd	94	190	110	95
3	2	8	Male	12	1st	48	200	60	60
3	2	8	Male	12	2nd	121	160	120	122
3	2	8	Male	12	3rd	94	190	105	95
3	3	9	Male	13	1st	48	200	72	60
3	3	9	Male	13	2nd	121	160	136	122
3	3	9	Male	13	3rd	94	190	102	95
4	1	10	Female	13	1st	94	190	120	95
4	1	10	Female	13	2nd	48	200	25	55
4	1	10	Female	13	3rd	121	160	130	99
4	2	11	Female	13	1st	94	190	107	95
4	2	11	Female	13	2nd	48	200	41	55
4	2	11	Female	13	3rd	121	160	122	99
4	3	12	Female	13	1st	94	190	110	95
4	3	12	Female	13	2nd	48	200	50	55
4	3	12	Female	13	3rd	121	160	101	99
5	1	13	Male	13	1st	94	190	90	95
5	1	13	Male	13	2nd	121	160	135	115
5	1	13	Male	13	3rd	48	200	75	60
5	2	14	Male	13	1st	94	190	95	95
5	2	14	Male	13	2nd	121	160	130	115
5	2	14	Male	13	3rd	48	200	50	60
5	3	15	Male	13	1st	94	190	100	95
5	3	15	Male	13	2nd	121	160	120	115
5	3	15	Male	13	3rd	48	200	65	60
6	1	16	Female	13	1st	48	200	50	70
6	1	16	Female	13	2nd	121	160	135	140
6	1	16	Female	13	3rd	94	190	110	110
6	2	17	Female	13	1st	48	200	90	70
6	2	17	Female	13	2nd	121	160	135	140
6	2	17	Female	13	3rd	94	190	110	110
6	3	18	Female	13	1st	48	200	75	70
6	3	18	Female	13	2nd	121	160	140	140
6	3	18	Female	13	3rd	94	190	105	110
8	1	19	Male	13	1st	94	190	106	115
8	1	19	Male	13	2nd	48	200	65	70
8	1	19	Male	13	3rd	121	160	145	139
8	2	20	Male	13	1st	94	190	75	115
8	2	20	Male	13	2nd	48	200	81	70
8	2	20	Male	13	3rd	121	160	125	139
8	3	21	Male	13	1st	94	190	87	115
8	3	21	Male	13	2nd	48	200	78	70
8	3	21	Male	13	3rd	121	160	134	139
7	1	22	Female	13	1st	121	160	130	135
7	1	22	Female	13	2nd	94	190	95	105
7	1	22	Female	13	3rd	48	200	60	40
7	2	23	Female	12	1st	121	160	135	135
7	2	23	Female	12	2nd	94	190	83	105
7	2	23	Female	12	3rd	48	200	36	40
7	3	24	Female	13	1st	121	160	140	135
7	3	24	Female	13	2nd	94	190	110	105
7	3	24	Female	13	3rd	48	200	50	40
11	1	25	Male	13	1st	48	200	50	50
11	1	25	Male	13	2nd	121	160	120	128
11	1	25	Male	13	3rd	94	190	100	101
11	2	26	Male	13	1st	48	200	50	50
11	2	26	Male	13	2nd	121	160	130	128
11	2	26	Male	13	3rd	94	190	100	101
11	3	27	Male	13	1st	48	200	57	50
11	3	27	Male	13	2nd	121	160	132	128
11	3	27	Male	13	3rd	94	190	104	101
21	1	28	Male	13	1st	94	190	82	87
21	1	28	Male	13	2nd	48	200	56	58
21	1	28	Male	13	3rd	121	160	108	118
21	2	29	Male	13	1st	94	190	85	87
21	2	29	Male	13	2nd	48	200	54	58
21	2	29	Male	13	3rd	121	160	135	118
21	3	30	Male	13	1st	94	190	87	87
21	3	30	Male	13	2nd	48	200	65	58
21	3	30	Male	13	3rd	121	160	113	118
20	1	31	Female	13	1st	48	200	75	78
20	1	31	Female	13	2nd	121	160	120	119
20	1	31	Female	13	3rd	94	190	92	92
20	2	32	Female	13	1st	48	200	80	78
20	2	32	Female	13	2nd	121	160	120	119
20	2	32	Female	13	3rd	94	190	93	92
20	3	33	Female	12	1st	48	200	80	78
20	3	33	Female	12	2nd	121	160	117	119
20	3	33	Female	12	3rd	94	190	90	92
17	1	34	Male	13	1st	94	190	160	130
17	1	34	Male	13	2nd	48	200	50	45
17	1	34	Male	13	3rd	121	160	140	135
17	2	35	Male	13	1st	94	190	120	130
17	2	35	Male	13	2nd	48	200	50	45
17	2	35	Male	13	3rd	121	160	130	135
17	3	36	Male	13	1st	94	190	100	130
17	3	36	Male	13	2nd	48	200	15	45
17	3	36	Male	13	3rd	121	160	150	135
16	1	37	Male	13	1st	48	200	40	50
16	1	37	Male	13	2nd	121	160	125	115
16	1	37	Male	13	3rd	94	190	80	87
16	2	38	Male	13	1st	48	200	72	50
16	2	38	Male	13	2nd	121	160	121	115
16	2	38	Male	13	3rd	94	190	83	87
16	3	39	Male	13	1st	48	200	90	50
16	3	39	Male	13	2nd	121	160	110	115
16	3	39	Male	13	3rd	94	190	85	87
15	1	40	Male	13	1st	94	190	95	97
15	1	40	Male	13	2nd	48	200	50	45
15	1	40	Male	13	3rd	121	160	150	139
15	2	41	Male	13	1st	94	190	110	97
15	2	41	Male	13	2nd	48	200	50	45
15	2	41	Male	13	3rd	121	160	140	139
15	3	42	Male	13	1st	94	190	103	97
15	3	42	Male	13	2nd	48	200	40	45
15	3	42	Male	13	3rd	121	160	138	139
18	1	43	Female	12	1st	121	160	115	123
18	1	43	Female	12	2nd	94	190	97	100
18	1	43	Female	12	3rd	48	200	72	77
18	2	44	Female	12	1st	121	160	120	123
18	2	44	Female	12	2nd	94	190	125	100
18	2	44	Female	12	3rd	48	200	75	77
18	3	45	Female	12	1st	121	160	125	123
18	3	45	Female	12	2nd	94	190	90	100
18	3	45	Female	12	3rd	48	200	98	77
14	1	46	Male	13	1st	48	200	70	50
14	1	46	Male	13	2nd	121	160	140	133
14	1	46	Male	13	3rd	94	190	115	100
14	2	47	Male	13	1st	48	200	95	50
14	2	47	Male	13	2nd	121	160	130	133
14	2	47	Male	13	3rd	94	190	93	100
14	3	48	Male	13	1st	48	200	30	50
14	3	48	Male	13	2nd	121	160	130	133
14	3	48	Male	13	3rd	94	190	100	100
22	1	49	Female	13	1st	121	160	120	120
22	1	49	Female	13	2nd	94	190	85	88
22	1	49	Female	13	3rd	48	200	75	63
22	2	50	Female	13	1st	121	160	99	120
22	2	50	Female	13	2nd	94	190	87	88
22	2	50	Female	13	3rd	48	200	73	63
22	3	51	Female	13	1st	121	160	141	120
22	3	51	Female	13	2nd	94	190	94	88
22	3	51	Female	13	3rd	48	200	42	63
19	1	52	Male	13	1st	48	200	60	67
19	1	52	Male	13	2nd	121	160	145	142
19	1	52	Male	13	3rd	94	190	85	90
19	2	53	Male	14	1st	48	200	50	67
19	2	53	Male	14	2nd	121	160	140	142
19	2	53	Male	14	3rd	94	190	95	90
19	3	54	Male	14	1st	48	200	91	67
19	3	54	Male	14	2nd	121	160	145	142
19	3	54	Male	14	3rd	94	190	100	90
23	1	55	Female	14	1st	94	190	89	115
23	1	55	Female	14	2nd	48	200	75	51
23	1	55	Female	14	3rd	121	160	110	125
23	2	56	Female	14	1st	94	190	110	115
23	2	56	Female	14	2nd	48	200	60	51
23	2	56	Female	14	3rd	121	160	140	125
23	3	57	Female	13	1st	94	190	125	115
23	3	57	Female	13	2nd	48	200	40	51
23	3	57	Female	13	3rd	121	160	135	125
26	1	58	Female	14	1st	48	200	40	40
26	1	58	Female	14	2nd	121	160	80	135
26	1	58	Female	14	3rd	94	190	92	90
26	2	59	Male	14	1st	48	200	49	40
26	2	59	Male	14	2nd	121	160	139	135
26	2	59	Male	14	3rd	94	190	90	90
26	3	60	Male	14	1st	48	200	40	40
26	3	60	Male	14	2nd	121	160	137	135
26	3	60	Male	14	3rd	94	190	95	90
27	1	61	Female	14	1st	94	190	105	105
27	1	61	Female	14	2nd	48	200	60	60
27	1	61	Female	14	3rd	121	160	140	130
27	2	62	Female	14	1st	94	190	110	105
27	2	62	Female	14	2nd	48	200	50	60
27	2	62	Female	14	3rd	121	160	120	130
27	3	63	Female	14	1st	94	190	100	105
27	3	63	Female	14	2nd	48	200	70	60
27	3	63	Female	14	3rd	121	160	120	130
24	1	64	Female	14	1st	121	160	132	132
24	1	64	Female	14	2nd	94	190	75	95
24	1	64	Female	14	3rd	48	200	42	41
24	2	65	Female	14	1st	121	160	142	132
24	2	65	Female	14	2nd	94	190	95	95
24	2	65	Female	14	3rd	48	200	41	41
24	3	66	Female	14	1st	121	160	144	132
24	3	66	Female	14	2nd	94	190	95	95
24	3	66	Female	14	3rd	48	200	39	41
25	1	67	Female	14	1st	48	200	65	59
25	1	67	Female	14	2nd	121	160	133	130
25	1	67	Female	14	3rd	94	190	95	95
25	2	68	Female	14	1st	48	200	67	59
25	2	68	Female	14	2nd	121	160	127	130
25	2	68	Female	14	3rd	94	190	95	95
25	3	69	Female	13	1st	48	200	50	59
25	3	69	Female	13	2nd	121	160	130	130
25	3	69	Female	13	3rd	94	190	95	95
13	1	70	Male	13	1st	94	190	130	110
13	1	70	Male	13	2nd	48	200	50	45
13	1	70	Male	13	3rd	121	160	140	135
13	2	71	Male	14	1st	94	190	110	110
13	2	71	Male	14	2nd	48	200	40	45
13	2	71	Male	14	3rd	121	160	140	135
13	3	72	Male	14	1st	94	190	100	110
13	3	72	Male	14	2nd	48	200	40	45
13	3	72	Male	14	3rd	121	160	130	135
