# Supplementary material for: Adolescents show collective intelligence which can be driven by a geometric mean rule of thumb
Source: PLOS journal article supplement (doi:10.1371/journal.pone.0204462), 2018-09-24
Supplement: S8 (10.1371/journal.pone.0204462.s008) [file journal.pone.0204462.s008]

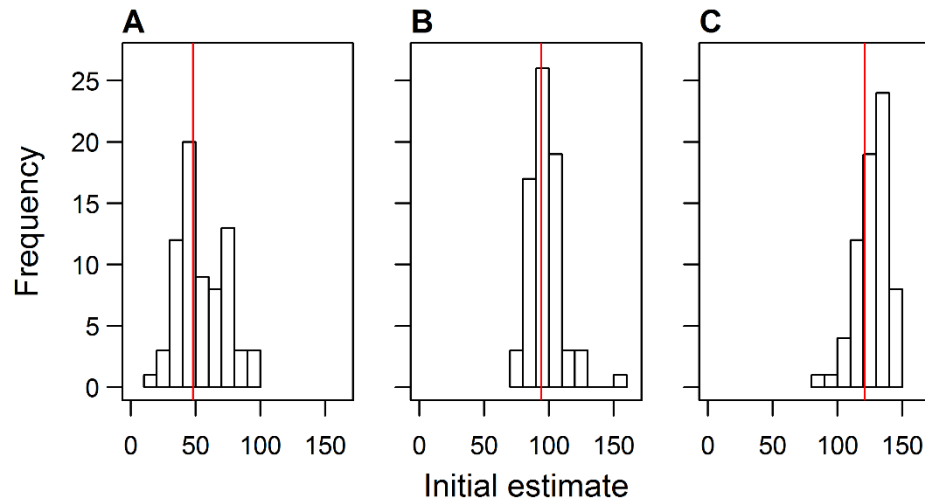

**S7 Fig. Distribution of individual initial estimates in Experiment 2.** The distributions of estimates (how many black sweets were in each jar) depended on the proportion of black sweets (**A**: 48/200, **B**: 94/190, **C**: 121/160). The correct value for each treatment is shown by the red vertical lines.
