# Supplementary material for: Adolescents show collective intelligence which can be driven by a geometric mean rule of thumb
Source: PLOS journal article supplement (doi:10.1371/journal.pone.0204462), 2018-09-24
Supplement: S10 (10.1371/journal.pone.0204462.s010) [file journal.pone.0204462.s010]

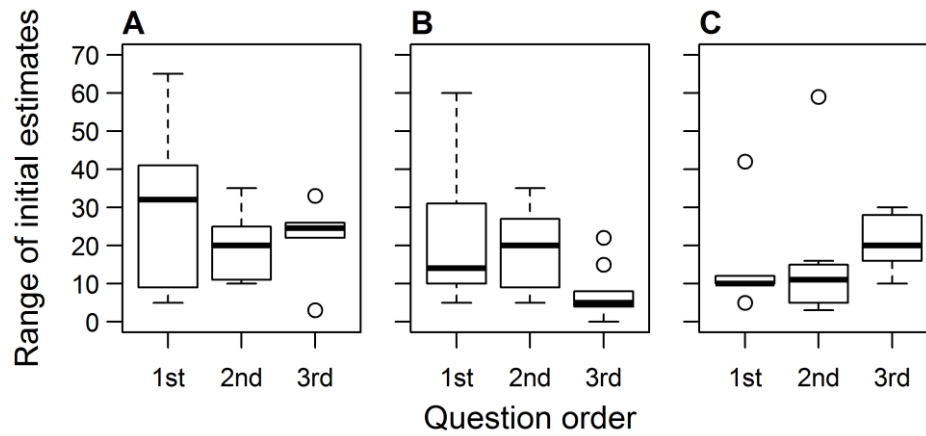

**S9 Fig. The effect of question order and treatment on the disagreement (range) of initial estimates in Experiment 2.** Data are panelled by treatment (proportion of black sweets): 48/200 (A), 94/190 (B) and 121/160 (C). The box plots show the median (thick black lines), interquartile range (enclosed by the boxes),  $1.5 \times$  the interquartile range beyond the boxes (whiskers) and outliers beyond the whiskers (open circles).
